# Supplementary material
Source: HighWire-hosted journal article supplement (https://jnm.snmjournals.org/highwire/filestream/93915/field_highwire_adjunct_files/0/33704_erratum_12-11-07.pdf)
Supplement: 33704_erratum_12-11-07.pdf [file 33704_erratum_12-11-07.pdf]

---

---

# Lung Toxicity in Radioiodine Therapy of Thyroid Carcinoma: Development of a Dose-Rate Method and Dosimetric Implications of the 80-mCi Rule

George Sgouros<sup>1</sup>, Hong Song<sup>1</sup>, Paul W. Ladenson<sup>1,2</sup>, and Richard L. Wahl<sup>1,2</sup>

<sup>1</sup>Division of Nuclear Medicine, Russell H. Morgan Department of Radiology and Radiological Science, School of Medicine, Johns Hopkins University, Baltimore, Maryland; and <sup>2</sup>Division of Endocrinology and Metabolism, Department of Medicine, School of Medicine, Johns Hopkins University, Baltimore, Maryland

---

Based on an extensive dataset analyzed by Benua et al., a whole-body retention threshold of 2.96 GBq (80 mCi) at 48 h has been used to limit the radioactivity of <sup>131</sup>I administered to thyroid cancer patients with diffuse pulmonary metastases. In this work, the 80-mCi activity retention limit is used to derive lung-absorbed doses and dose rates. The resulting dose-rate-based limits make it possible to account for patient-specific differences in lung geometry. This is particularly important, for example, in pediatric patients exhibiting diffuse lung metastases. The approach also highlights the impact of altered radioiodine kinetics as seen with recombinant human thyroid-stimulating hormone. **Methods:** The dose-rate constraint (DRC) was defined as the absorbed dose rate to the lungs of the adult female reference phantom when 80 mCi of <sup>131</sup>I are in the body and 90% of this is uniformly distributed in the lungs. With this definition, the 80-mCi rule was generalized by calculating the activity required to yield a dose rate equal to DRC using lung-to-lung S factor values corresponding to different reference phantoms. **Results:** A DRC value of 41.1 cGy/h was obtained. Applying this DRC to the adult male phantom and to the phantom of a 15-y-old yields equivalent 48-h activity limits of 3.73 GBq (101 mCi) and 2.46 GBq (66.4 mCi), respectively. Depending on model parameters, the absorbed doses to lungs ranged from 54 to 83 Gy; the photon-only portion, which better reflects the dose to normal lung parenchyma, ranged from 4.6 to 10.1 Gy. **Conclusion:** A dose-rate-based version of the 80-mCi rule is derived and used to demonstrate application of this rule to pediatric patients and to adult male patients. The implications of the 80-mCi rule are also examined. The assumption of uniform energy deposition in the lungs leads to substantially overestimated absorbed doses. Severe radiation-induced lung toxicity, expected at normal lung absorbed doses of 25–27 Gy, is avoided, probably because most of the local electron dose is delivered to tumor tissue instead of to normal lung parenchyma. The possibility of using a DRC to adjust treatment for different clinical situations is illustrated.

**Key Words:** patient-specific dosimetry; thyroid carcinoma; <sup>131</sup>I; lung metastases; pulmonary fibrosis

**J Nucl Med 2006; 47:1977–1984**

---

**T**he observation that repeated <sup>131</sup>I treatment of metastatic thyroid carcinoma with subtherapeutic doses often fails to cause tumor regression and can lead to loss of iodine avidity in metastases led Benua and Leeper to propose a dosimetry-based treatment-planning approach to <sup>131</sup>I thyroid cancer therapy (1). The objective of the approach was to identify the largest administered <sup>131</sup>I radioactivity that would be safe yet optimally therapeutic. Drawing on a large database of patient studies, they formulated the following constraints on the administered activity. First, the blood absorbed dose should not exceed 200 rad. This was recognized to be a surrogate for red bone marrow absorbed dose and was intended to decrease the likelihood of severe marrow depression, the dose-limiting toxicity in radioiodine therapy of thyroid cancer. Second, whole-body retention at 48 h should not exceed 4.44 GBq (120 mCi). This was shown to prevent release of <sup>131</sup>I-labeled protein into the circulation from damaged tumor (2). Third, in the presence of diffuse lung metastases, the 48-h whole-body retention should not exceed 2.96 GBq (80 mCi). This constraint was chosen to avoid pneumonitis and pulmonary fibrosis.

The lung-related constraint is derived, primarily, from a series of 15 patients (11 female and 4 male) with pulmonary metastases (3) who were treated with <sup>131</sup>I in the late 1950s. Two of these patients died of pulmonary fibrosis and pneumonitis after single administrations of 11.1 and 7.84 GBq of <sup>131</sup>I to women 27 and 32 y old, respectively. Another 2 patients experienced dyspnea with radiographic evidence of fibrosis after single doses of 11.1 and 9.32 GBq; the patient receiving the latter dose had received 4.77 GBq 2.5 y earlier. Both these patients were first treated as teenagers, when 13 and 15 y old, respectively. Since these activity constraints were implemented, the incidence of

---

Received Jun. 9, 2006; revision accepted Sep. 5, 2006.  
For correspondence or reprints contact: George Sgouros, PhD, School of Medicine, Johns Hopkins University, CRB II 4M61, 1550 Orleans St., Baltimore, MD 21231.  
E-mail: gsgouros@jhmi.edu

life-threatening radiation-induced side effects has been reduced substantially. These treatment-planning guidelines were used to obtain a distribution of administered activities in 116 patients with  $^{131}\text{I}$ -avid metastases. The mean administered activity was 10.8 GBq (293 mCi), and the largest was 24.2 GBq (654 mCi). Benua and Leeper noted that had a fixed amount of 5.6–7.4 GBq (150–200 mCi) been applied, 92 of the administrations would have undertreated the patient. It is important to note, however, that there is still no evidence that a treatment-planning approach to  $^{131}\text{I}$  treatment of thyroid cancer yields results that are better than fixed-activity therapy when the endpoint is survival (4–6). This may reflect the lack of standardization in dosimetry methodologies, the state of sophistication of dosimetry, or possibly the reluctance to treat to a dosimetrically defined tolerance level; most likely, all 3 reasons are involved.

The lungs are the most common extracervical recurrence site in patients who fail radioiodine therapy; approximately half of these patients die of their disease (7–9). The guidelines regarding activity prescription in the presence of lung disease were formulated before the availability of nuclear medicine imaging and were based on urinary excretion measurements (3). Given the importance of pulmonary disease in thyroid cancer morbidity and mortality, a dosimetric analysis has been performed to place the activity-based Benua–Leeper constraints on a dosimetric foundation. In this work, we have examined the implications of the activity constraints in terms of lung dose rate and total absorbed dose.

## MATERIALS AND METHODS

### Dose-Rate Constraint (DRC)

The following equations are used to obtain the dose rate,  $DR(t)$ , to lungs at time  $t$  in reference phantom  $P$ .

$$DR^P(t) = A_{LU}(t) \cdot S_{LU \leftarrow LU}^P + A_{RB}(t) \cdot S_{LU \leftarrow RB}^P, \quad \text{Eq. 1}$$

where

$$A_{LU}(t) = \frac{A_T \cdot F_T}{e^{-\lambda_{LU} \cdot T}} e^{-\lambda_{LU} \cdot t}, \quad \text{Eq. 2}$$

$$A_{RB}(t) = \frac{A_T \cdot (1 - F_T)}{e^{-\lambda_{RB} \cdot T}} e^{-\lambda_{RB} \cdot t}, \quad \text{Eq. 3}$$

and

$$S_{LU \leftarrow RB}^P = S_{LU \leftarrow TB}^P \cdot \frac{M_{TB}^P}{(M_{TB}^P - M_{LU}^P)} - S_{LU \leftarrow LU}^P \cdot \frac{M_{LU}^P}{(M_{TB}^P - M_{LU}^P)} \quad \text{Eq. 4}$$

and where  $A_{LU}(t)$  is lung activity at time  $t$ ,  $S_{LU \leftarrow LU}^P$  is the lung-to-lung  $^{131}\text{I}$  S factor for reference phantom  $P$ ,  $A_{RB}(t)$  is the remainder-of-body activity (total-body – lung) at time  $t$ ,  $S_{LU \leftarrow RB}^P$  is the remainder-of-body-to-lung  $^{131}\text{I}$  S factor for reference phantom  $P$ ,  $A_T$  is whole-body activity at time  $T$ ,  $F_T$  is the fraction of  $A_T$  that is

in the lungs at time  $T$ ,  $\lambda_{LU}$  is the effective clearance rate from lungs ( $\ln(2)/T_E$ , with  $T_E$  equal to effective half-life),  $\lambda_{RB}$  is the effective clearance rate from the remainder of the body ( $\ln(2)/T_{RB}$ , with  $T_{RB}$  equal to effective half-life in the remainder of the body),  $S_{LU \leftarrow TB}^P$  is the total-body-to-lung  $^{131}\text{I}$  S factor for reference phantom  $P$ ,  $M_{TB}^P$  is the total-body mass of reference phantom  $P$ , and  $M_{LU}^P$  is the lung mass of reference phantom  $P$ .

Equation 2 describes a model in which radioiodine uptake in tumor-bearing lungs is assumed instantaneous relative to the clearance kinetics. Clearance is modeled by an exponential expression with a clearance rate constant  $\lambda_{LU}$  and corresponding effective half-life  $T_E$ . At a particular time  $T$  after administration, the fraction of whole-body activity that is in the lungs is given by the parameter  $F_T$ . Activity that is not in the lungs (i.e., is in the remainder of the body) is also modeled by an exponential clearance (Eq. 3) but with a different rate constant,  $\lambda_{RB}$ . At time  $T$ , the fraction of whole-body activity in this compartment is  $1 - F_T$ . Equation 4 is obtained from Loevinger et al. (10).

When Equations 2 and 3 are used to replace for  $A_{LU}(t)$  and  $A_{RB}(t)$  in Equation 1, the dose rate to lungs at time  $T$  for phantom  $P$  is

$$DR^P(T) = A_T \cdot F_T \cdot S_{LU \leftarrow LU}^P + A_T \cdot (1 - F_T) \cdot S_{LU \leftarrow RB}^P. \quad \text{Eq. 5}$$

### Derived Activity Constraint

If we assume that the dose rate to the lungs at 48 h is the relevant constraint on avoiding prohibitive lung toxicity, then one may derive 48-h activity constraints for different reference phantoms that give a 48-h dose rate equal to a predetermined fixed dose-rate constraint, denoted DRC. By reordering expression 5 and renaming  $A_T$  to  $A_{DRC}^P$ , the activity constraint for phantom  $P$ , so that  $DR^P(48 \text{ h}) = \text{DRC}$ , we get

$$A_{DRC}^P = \frac{\text{DRC}}{F_{48} \cdot S_{LU \leftarrow LU}^P + (1 - F_{48}) \cdot S_{LU \leftarrow RB}^P}. \quad \text{Eq. 6}$$

In Equation 6,  $A_{DRC}^P$  depends on the fraction of whole-body activity in the lungs at 48 h and also on the reference phantom that best matches the patient characteristics.

### Corresponding Administered Activity

Equation 6 gives the 48-h whole-body activity constraint so that the dose rate to lungs at 48 h does not exceed DRC. The corresponding constraint on the maximum administered activity,  $AA_{\text{max}}$ , can be derived by using Equations 2 and 3 to give an expression for the total-body activity as a function of time:

$$A_{TB}(t) = \frac{A_T \cdot F_T}{e^{-\lambda_{LU} \cdot T}} e^{-\lambda_{LU} \cdot t} + \frac{A_T \cdot (1 - F_T)}{e^{-\lambda_{RB} \cdot T}} e^{-\lambda_{RB} \cdot t}. \quad \text{Eq. 7}$$

Replacing  $A_T$  with  $A_{DRC}^P$  and setting  $t = 0$ , we obtain the following expression for  $AA_{\text{max}}$ :

$$AA_{\text{max}} = \frac{A_{DRC}^P \cdot F_{48}}{e^{-\lambda_{LU} \cdot 48}} + \frac{A_{DRC}^P \cdot (1 - F_{48})}{e^{-\lambda_{RB} \cdot 48}}. \quad \text{Eq. 8}$$

The denominator in each term of this expression scales the activity up to reflect the starting value needed to obtain

$A_{TB}(48\text{ h}) = A_{DRC}^P \cdot AA_{\max}$  is shown to be dependent on  $\lambda_{LU}$  and  $\lambda_{RB}$  (or, equivalently, on  $T_E$  and  $T_{RB}$ ).

### Mean Lung Absorbed Dose

The mean lung absorbed dose may be obtained by integrating Equation 1 from zero to infinity:

$$D_{LU} = \tilde{A}_{LU} \cdot S_{LU \leftarrow LU}^P + \tilde{A}_{RB} \cdot S_{LU \leftarrow RB}^P \quad \text{Eq. 9}$$

Integrating the expressions for lung and remainder-of-body activity as a function of time (Eqs. 2 and 3, respectively), and replacing parameters with the 48-h constraint values, the following expressions are obtained for  $\tilde{A}_{LU}$  and  $\tilde{A}_{RB}$ :

$$\tilde{A}_{LU} = \frac{A_{DRC}^P \cdot F_{48} \cdot e^{\frac{\ln(2)}{T_E} T}}{\ln(2)} \cdot T_E, \quad \text{Eq. 10}$$

and

$$\tilde{A}_{RB} = \frac{A_{DRC}^P \cdot (1 - F_{48}) \cdot e^{\frac{\ln(2)}{T_{RB}} T}}{\ln(2)} \cdot T_{RB}. \quad \text{Eq. 11}$$

In Equations 10 and 11, the  $\lambda$  values have been replaced to explicitly show the dependence of the cumulated activities on the clearance half-lives.

If  $T_{RB}$  is kept constant and  $T_E$  is varied, the minimum absorbed dose to the lungs will occur at a  $T_E$  value that gives a minimum for Equation 9. This can be obtained by differentiating with respect to  $T_E$ , setting the resulting expression to zero and solving for  $T_E$ . This gives  $T_E = \ln(2) \cdot 48\text{ h} = 33\text{ h}$ .

### Electron Versus Photon Contribution to Lung Dose

Because almost all activity in tumor-bearing lungs would be localized to tumor cells, it is instructive to separate the electron contribution to the estimated lung dose from the photon contribution. The electron contribution would be expected, depending on the tumor geometry (11), to irradiate tumor cells predominantly, whereas the photon contribution will irradiate lung parenchyma. The dose contribution from the remainder of the body is already limited to photon emissions. The photon-only lung-to-lung S value ( $S_{LU \leftarrow LU}^P$ ) for a phantom  $P$  is obtained from the S factor value and the  $\Delta$ -value for electron emissions of  $^{131}\text{I}$ :

$$S_{LU \leftarrow LU}^{PP} = S_{LU \leftarrow LU}^P - \frac{\Delta_{electron}^{131\text{I}}}{M_{LU}^P}, \quad \text{Eq. 12}$$

where  $\Delta_{electron}^{131\text{I}}$  is total energy emitted as electrons per disintegration of  $^{131}\text{I}$ .

Replacing  $S_{LU \leftarrow LU}^{PP}$  for  $S_{LU \leftarrow LU}^P$  in Equation 9 gives the absorbed dose to lungs from photon emissions only.

### Parameter Values

Table 1 lists the reference phantom parameter values used in the calculations. The masses, lung-to-lung S values, and total-body-to-lung S values listed were obtained from the OLINDA dose calculation program (12,13). The remainder-of-body-to-lung and lung-to-lung photon-only S values were calculated using Equations 4 and 12, respectively. The effective clearance half-life of radioiodine activity not localized to the lungs,  $T_{RB}$ , was set to 10 or 20 h. These values correspond to reported values for whole-body clearance with or without recombinant thyroid-stimulating hormone, respectively (14,15). The effective clearance half-life for activity in tumor-bearing lungs,  $T_E$ , was varied from 20 to 100 h (16). The fraction of whole-body activity in the lungs at 48 h,  $F_{48}$ , was varied from 0.6 to 1.

### RESULTS

To derive the dose rate to lungs associated with the 80-mCi, 48-h constraint, we assume that 90% of the whole-body activity is uniformly distributed in the lungs ( $F_{48} = 0.9$ ). The original reports describing the 80-mCi, 48-h limit do not provide a value for this parameter; the value chosen is consistent with the expected biodistribution in patients with disease that is dominated by diffuse lung metastases. As noted in the introduction, the 80-mCi activity constraint was derived primarily from results obtained in women. Accordingly, activity is converted to dose rate using S factors and masses for the adult female phantom. Using Equation 5, with  $F_{48} = 0.9$ , the DRC corresponding to the 48-h, 80-mCi limit is 41.1 cGy/h. This is the estimated dose rate to the lungs when 80 mCi of  $^{131}\text{I}$  are uniformly distributed in the lungs of a woman whose anatomy is consistent with the standard female adult phantom geometry. Implicit in the constraint of 80 mCi at 48 h is that radiation-induced pneumonitis and pulmonary fibrosis will be avoided as long as the dose rate does not exceed 41.1 cGy/h at 48 h after  $^{131}\text{I}$  administration. If we assume that this dose-rate-based constraint applies to pediatric patients, then using Equation 6, we may calculate the 48-h activity limitation if the patient anatomy is consistent with the standard phantom for a 15- or 10-y-old. Figure 1 provides the 48-h whole-body activity retention values for different phantoms and  $F_{48}$  values. Because the guidelines were developed with data from women, the 80-mCi rule applied to

**TABLE 1**  
Values for Parameters in Reference Phantoms

| Reference phantom | $M_{TB}$ (kg) | $M_{LU}$ (kg) | $S_{LU \leftarrow LU}$ (mGy/MBq-s) | $S_{LU \leftarrow TB}$ (mGy/MBq-s) | $S_{LU \leftarrow RB}$ (mGy/MBq-s) | $S_{LU \leftarrow LU}^P$ (mGy/MBq-s) |
|-------------------|---------------|---------------|------------------------------------|------------------------------------|------------------------------------|--------------------------------------|
| Male adult        | 73.7          | 1.00          | $3.40 \times 10^{-5}$              | $7.22 \times 10^{-7}$              | $2.64 \times 10^{-7}$              | $3.60 \times 10^{-6}$                |
| Female adult      | 56.9          | 0.80          | $4.28 \times 10^{-5}$              | $9.34 \times 10^{-7}$              | $3.37 \times 10^{-7}$              | $4.80 \times 10^{-6}$                |
| 15-y-old          | 56.8          | 0.65          | $5.16 \times 10^{-5}$              | $9.33 \times 10^{-7}$              | $3.46 \times 10^{-7}$              | $4.90 \times 10^{-6}$                |
| 10-y-old          | 33.2          | 0.45          | $7.34 \times 10^{-5}$              | $1.48 \times 10^{-6}$              | $4.85 \times 10^{-7}$              | $6.29 \times 10^{-6}$                |

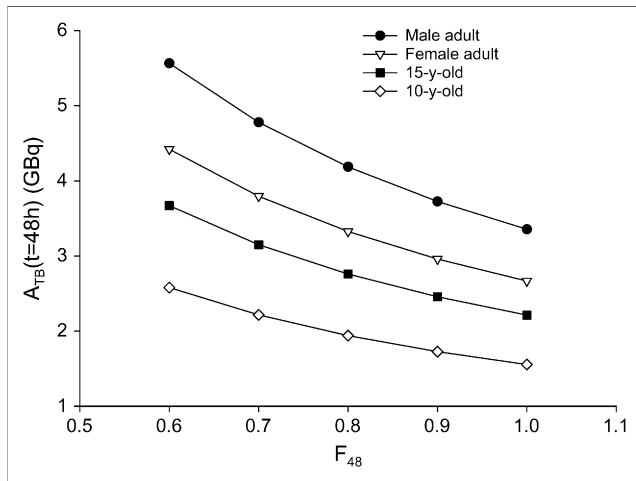

**FIGURE 1.** Whole-body 48-h activity retention limits for different phantoms and  $F_{48}$  values.

the adult male phantom gives a 48-h whole-body activity constraint of 3.73 GBq (101 mCi) at  $F_{48} = 0.9$ ; corresponding values for the phantoms of a 15-y-old and 10-y-old are 2.46 GBq (66.4 mCi) and 1.73 GBq (46.7 mCi), respectively. It is important to note that DRC, because it is a dose rate, does not depend on the clearance parameters. The value chosen does, however, depend on the assumed lung fraction of whole-body activity. Table 2 lists the DRC values for different  $F_{48}$  values. All the results presented will scale linearly by DRC value.

Most patients with diffuse  $^{131}\text{I}$ -avid lung metastases exhibit prolonged whole-body retention. In such cases, the whole-body kinetics are dominated by tumor-associated activity. Assuming that 90% of the whole-body activity is in the lungs and that this clears with an effective half-life of 100 h, whereas the remainder activity clears with an effective half-life of 20 h (corresponding to a treatment plant that includes hormone withdrawal (15)), one may use Equation 8 to calculate the administered activity that will yield the corresponding 48-h activity constraint for each phantom. The administered activity values are 6.64, 5.23,

**TABLE 2**  
DRC Values for Different 48-Hour Lung-to-Whole-Body Activity Ratios\*

| $F_{48}$ | DRC (cGy/h) |
|----------|-------------|
| 1.0      | 45.6        |
| 0.9      | 41.1        |
| 0.8      | 36.6        |
| 0.7      | 32.0        |
| 0.6      | 27.5        |

\*Derived so that total-body retention at 48 h in female adult reference phantom is 2.96 GBq (80 mCi).

4.37, and 3.08 GBq (180, 143, 118, and 83.2 mCi, respectively) for the standard phantom anatomies of an adult male, adult female, 15-y-old, and 10-y-old, respectively. These values depend on the assumed clearance half-life of activity in the remainder of the body. If an effective half-life of 10 h (consistent with use of recombinant human thyroid-stimulating hormone) is assumed, the respective administered activity values are 15.1, 12.0, 9.92, and 6.98 GBq (407, 323, 268, and 189 mCi, respectively). Figure 2A depicts administered activity limits for different phantoms and  $F_{48}$  values as a function of  $T_E$  when  $T_{RB}$  is set to 20 h. Figure 2B depicts corresponding results when  $T_{RB}$  equals 10 h. The plots show that at  $T_E$  greater than 3–4 times  $T_{RB}$ , the administered activity limit is largely independent of lung clearance half-life but, as shown by the equidistant spacing of the curves with increasing  $F_{48}$ , remains linearly dependent on the fraction of whole-body activity that is in the lungs at 48 h. When  $T_E$  approaches the lower  $T_{RB}$  value as in Figure 2A,  $AA_{max}$  increases rapidly and appears to converge. This reflects the condition of a partitioned activity distribution that clears from the lungs and remainder of the body at the same effective half-life; the AA values at  $T_E = T_{RB} = 20$  h are not the same because the dose rate, which is used to determine  $AA_{max}$ , will be different because of the physical distribution of the activity even when the half-lives are the same. The rapid increase in  $AA_{max}$  at lower  $T_E$  values reflects the need to increase administered activity as the clearance rate increases.

Figure 3 depicts the absorbed dose to lungs as a function of  $T_E$  for different  $F_{48}$  values. Because the administered activities are adjusted to reach a constant 48-h dose rate in the lungs, the absorbed dose curves are essentially independent of phantom geometry, with less than a 2% difference in lung absorbed dose versus  $T_E$  profiles across the 4 standard phantom geometries (data not shown). As shown in figure 3, the dose versus  $T_E$  relationship is also independent of  $F_{48}$  and minimally sensitive to  $T_{RB}$ . This is because the remainder-of-body contribution to the total lung absorbed dose is negligible relative to the self-dose.

Both sets of curves show a minimum absorbed dose at  $T_E = 33.3$  h ( $\ln(2) \times 48$  h). The minimum absorbed dose is 53.6 for  $T_{RB} = 20$  h and ranges from 53.6 ( $F_{48} = 1$ ) to 54.2 ( $F_{48} = 0.6$ ) for  $T_{RB} = 10$  h.

Less is known about the effects of lung irradiation on pediatric patients or patients with already-compromised lung function. In such cases, a more conservative dose-rate limit may be appropriate. As noted earlier, the results shown in Figures 1–3 scale linearly with DRC. Table 3 summarizes the relevant results for the different phantoms at  $F_{48} = 0.9$  when DRC = 20 cGy/h. In the adult female phantom, this corresponds to 1.44 GBq (38.9 mCi) retained in the whole body at 48 h.

All the lung absorbed dose values shown in Figure 3 and listed in Table 3 are well above the reported 24- to 27-Gy maximum tolerated dose for adult lungs (17,18). The discrepancy may be explained by considering the photon

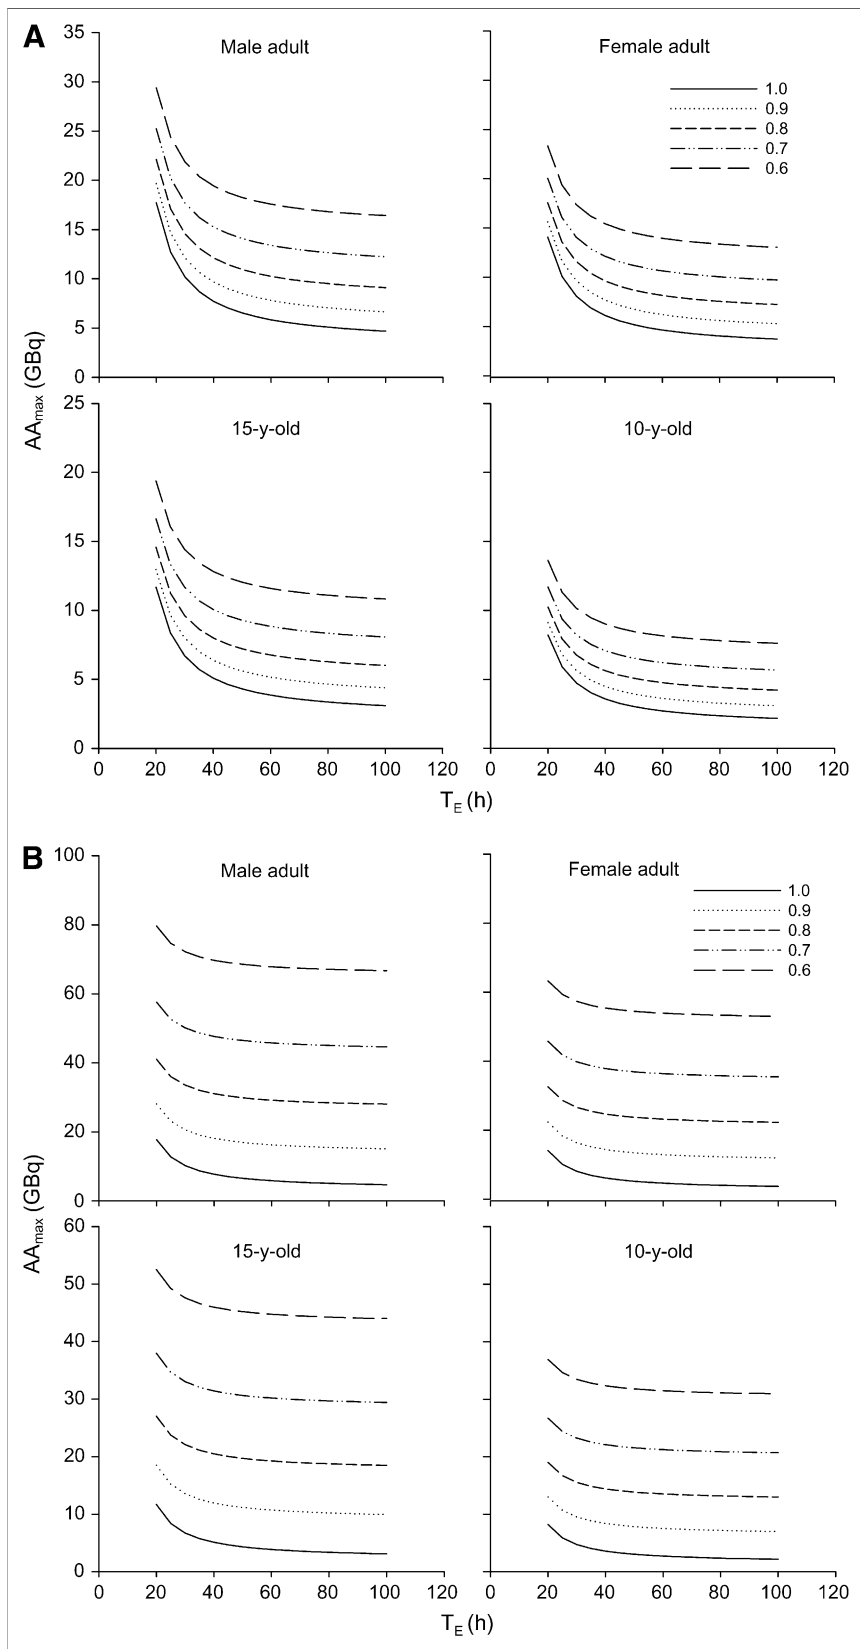

**FIGURE 2.** Administered activity limits for different phantoms and  $F_{48}$  values as function of  $T_E$  when  $T_{RB}$  is set to 20 h (A) or 10 h (B).

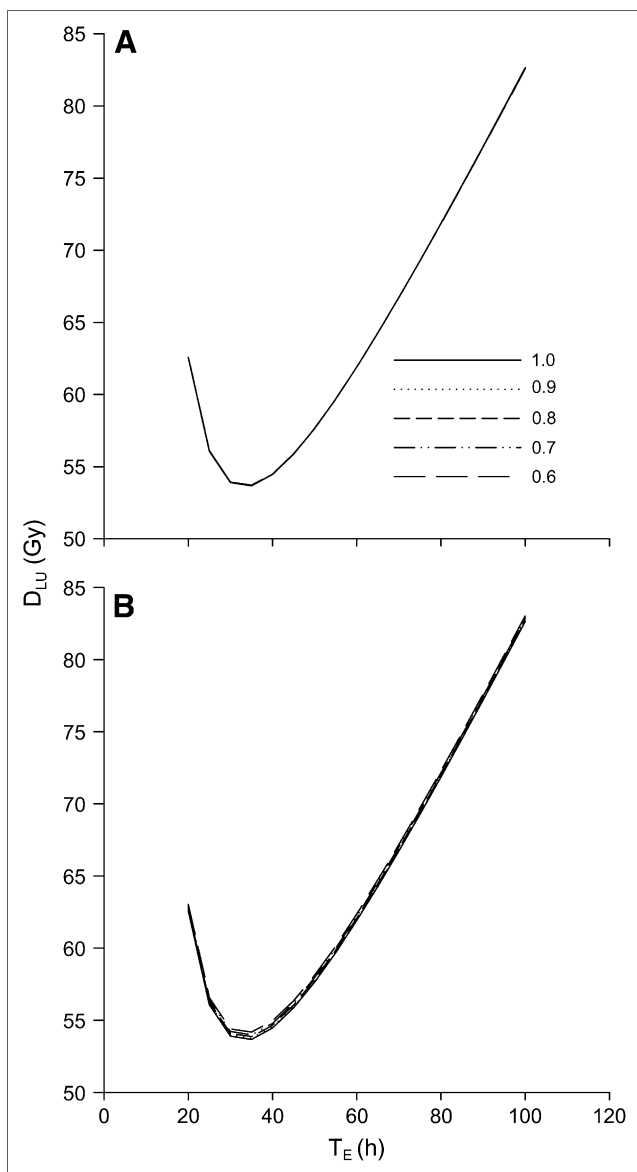

**FIGURE 3.** Absorbed dose to lungs as function of  $T_E$  for different  $F_{48}$  values when  $T_{RB}$  is set to 20 h (A) or 10 h (B). In A, the lung dose is insensitive to  $F_{48}$  and the curves are superimposed into a single curve.

and electron fraction of this absorbed dose. The electron emissions are deposited locally, most likely within the thyroid carcinoma cells that have invaded the lungs, whereas the photon contribution would irradiate the total

lung volume. Using Equations 9 and 12, the lung absorbed dose attributable to photons may be calculated. Absorbed dose versus  $T_E$  curves are depicted in Figure 4 for the adult female phantom and for the 2 different remainder-of-body effective clearance half-lives considered. As might be expected, the photon dose to lung is more sensitive to  $F_{48}$  than is the total lung dose (Fig. 3). This is because the remainder of body dose terms is dominated by the photon dose. Photon dose better reflects the absorbed dose to normal lung parenchyma and is generally below 10 Gy (at  $T_{RB} = 10$  h,  $T_E = 100$  h, and  $F_{48} = 0.6$ , the photon dose is 10.1 Gy). At  $T_E = 100$  h, the photon lung dose to the adult male phantom ranges from 8.75 Gy ( $F_{48} = 1.0$ ) to 9.03 Gy ( $F_{48} = 0.6$ ) when  $T_{RB} = 20$  h; the corresponding values when  $T_{RB} = 10$  h are 8.75 Gy ( $F_{48} = 1.0$ ) and 9.56 Gy ( $F_{48} = 0.6$ ). For the phantom of a 15-y-old, the respective values are 7.85, 8.10, 7.85, and 8.55 Gy; respective values for the phantom of a 10-y-old are 7.09, 7.33, 7.09, and 7.78 Gy.

### DISCUSSION

Benua et al. (1,2) found that the most effective approach for radioiodine treatment of thyroid cancer metastases was to deliver, in a single administration, the largest safe absorbed dose to tumor tissue. Their dosimetric approach placed constraints on the blood absorbed dose and on the whole-body activity retained at 48 h after  $^{131}\text{I}$  administration. If the patient was known to have diffuse lung metastases, the 48-h whole-body activity limit was set to 80 mCi. This value was arrived at primarily from toxicity observed in female patients.

In this work, we have translated the 80-mCi rule from an activity-based to a dose-rate-based limit. This translation has made it possible to mathematically extend the 80-mCi rule to pediatric patients and to show how it is influenced by the spatial distribution of activity at 48 h. The exercise has also revealed the possible need for a different activity limit in men from that in women. It is important to note that the underlying assumption with this approach is that lung radiosensitivity is invariant across different geometries and ages. As illustrated, however, a formalism is provided for adjusting the dose-rate limit and estimating administered activities based on clinical considerations. As noted in the methodology and results, the dose-rate limits derived in this work make no assumptions regarding clearance kinetics. Such

**TABLE 3**  
Dosimetric Results When DRC = 20 cGy/Hour and  $F_{48} = 0.9$

| Reference phantom | $A_{TB}(t = 48 \text{ h})$ (GBq) | $AA_{max}$ (GBq)        |                         | $D_{LU}$ (Gy)           |                         |
|-------------------|----------------------------------|-------------------------|-------------------------|-------------------------|-------------------------|
|                   |                                  | $T_{RB} = 20 \text{ h}$ | $T_{RB} = 10 \text{ h}$ | $T_{RB} = 20 \text{ h}$ | $T_{RB} = 10 \text{ h}$ |
| Male adult        | 1.81                             | 3.23                    | 7.33                    | 40.2                    | 40.3                    |
| Female adult      | 1.44                             | 2.57                    | 5.82                    | 40.2                    | 40.3                    |
| 15-y-old          | 1.20                             | 2.13                    | 4.83                    | 40.2                    | 40.3                    |
| 10-y-old          | 0.84                             | 1.50                    | 3.40                    | 40.2                    | 40.3                    |

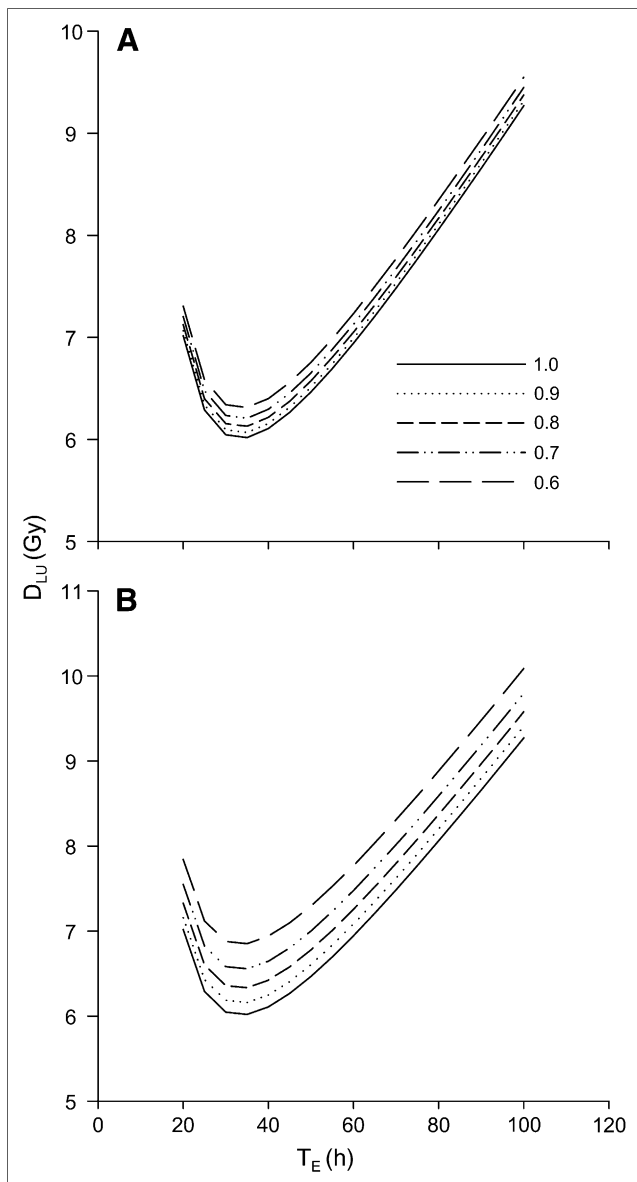

**FIGURE 4.** Absorbed dose vs.  $T_E$  for adult female phantom for the 2 different remainder-of-body effective clearance half-lives considered. Effective remainder-of-body clearance half-life,  $T_{RB}$ , is set to 20 h (A) or 10 h (B).

assumptions are required, however, in estimating maximum allowable administered activity and lung absorbed dose.

The total lung absorbed doses estimated were substantially greater than the 24- to 27-Gy maximum tolerated dose to the lungs for adults if the dose-rate equivalent of the 80-mCi rule is used to constrain the administered activity. The photon contribution to the absorbed dose, however, was within the 24- to 27-Gy limit in all except for the combination of a 10-h effective clearance half-life from the remainder of the body and a 48-h lung activity fraction of less than 0.9. The actual absorbed dose to the lungs will depend on the tumor cell distribution within the lungs (11).

The 80-mCi rule was established by Benua et al. (1,2) at a time when conventional nuclear medicine imaging was not available, when an internal dosimetry formalism did not exist, and when external radiotherapy was still in its infancy. It is remarkable, therefore, that this guideline, along with the blood-based absorbed dose limitation, has been so successful in limiting the morbidity associated with radioiodine therapy of thyroid cancer. The more difficult question in this regard is whether the approach is too conservative, potentially underdosing patients with diffuse lung metastases, which is a clinical stage often associated with treatment failure and one in which delivery of the maximum tolerated therapy is critical for a successful outcome. The analysis provided in this article is a possible first step in the direction of a treatment methodology that reduces the potential for underdosing in this population of thyroid cancer patients.

#### ACKNOWLEDGMENT

This work was supported by NIH/NCI grant R01CA116477.

#### REFERENCES

1. Benua RS, Leeper RD. A method and rationale for treatment of thyroid carcinoma with the largest, safe dose of 131-I. In: Medeiros-Neto G, Gaitan E, eds. *Frontiers in Thyroidology*. New York, NY: Plenum Medical; 1986: 1317.
2. Benua RS, Rawson RW, Sonenberg M, Cicale NR. Relation of radioiodine dosimetry to results and complications in treatment of metastatic thyroid cancer. *AJR*. 1962;87:171-182.
3. Rall JE, Alpers JB, Lewallen CG, Sonenberg M, Berman M, Rawson RW. Radiation pneumonitis and fibrosis: complication of radioiodine treatment of pulmonary metastases from cancer of the thyroid. *J Clin Endocrinol Metab*. 1957;17:1263-1276.
4. Robbins RJ, Schlumberger MJ. The evolving role of I-131 for the treatment of differentiated thyroid carcinoma. *J Nucl Med*. 2005;46(suppl):28S-37S.
5. Dorn R, Kopp J, Vogt H, Heidenreich P, Carroll RG, Gulec SA. Dosimetry-guided radioactive iodine treatment in patients with metastatic differentiated thyroid cancer: largest safe dose using a risk-adapted approach. *J Nucl Med*. 2003;44:451-456.
6. Gerard SK, Park HM. I-131 dosimetry and thyroid stunning. *J Nucl Med*. 2003; 44:2039-2040.
7. Clark JR, Lai P, Hall F, Borglund A, Eski S, Freeman JL. Variables predicting distant metastases in thyroid cancer. *Laryngoscope*. 2005;115:661-667.
8. Lin JD, Chao TC, Chou SC, Hsueh C. Papillary thyroid carcinomas with lung metastases. *Thyroid*. 2004;14:1091-1096.
9. Mazzaferri EL, Kloos RT. Current approaches to primary therapy for papillary and follicular thyroid cancer. *J Clin Endocrinol Metab*. 2001;86:1447-1463.
10. Loewinger R, Budinger TF, Watson EE. *MIRD Primer for Absorbed Dose Calculations*. Revised ed. New York, NY: Society of Nuclear Medicine; 1991.
11. Song H, Bin H, Prideaux A, et al. Lung dosimetry for radioiodine therapy treatment planning in the case of diffuse lung metastases. *J Nucl Med*. 2006;47: 1985-1994.
12. Stabin MG, Sparks RB, Crowe EB, Cremonesi M, Siegel JA. OLINDA/Exm 1.0 and Radar [abstract]. *Eur J Nucl Med Mol Imaging*. 2004;31(suppl):S471.
13. Stabin MG, Sparks RB. OLINDA: PC-based software for biokinetic analysis and internal dose calculations in nuclear medicine [abstract]. *J Nucl Med*. 2003; 44(suppl):103P.
14. North DL, Shearer DR, Hennessey JV, Donovan GL. Effective half-life of I-131 in thyroid cancer patients. *Health Phys*. 2001;81:325-329.
15. Hanscheid H, Lassmann M, Luster M, et al. Iodine biokinetics and dosimetry in radioiodine therapy of thyroid cancer: procedures and results of a prospective

- international controlled study of ablation after rhTSH or hormone withdrawal. *J Nucl Med.* 2006;47:648–654.
16. Samuel AM, Rajashekharrao B, Shah DH. Pulmonary metastases in children and adolescents with well-differentiated thyroid cancer. *J Nucl Med.* 1998;39:1531–1536.
  17. Emami B, Lyman J, Brown A, et al. Tolerance of normal tissue to therapeutic irradiation. *Int J Radiat Oncol Biol Phys.* 1991;21:109–122.
  18. Press OW, Eary JF, Appelbaum FR, et al. Radiolabeled-antibody therapy of B-cell lymphoma with autologous bone marrow support. *N Engl J Med.* 1993;329:1219–1224.
